# Supplementary material
Source: Royal Society of Chemistry journal article supplement (doi:10.1039/d6bm00329j)
Supplement: d6bm00329j1.pdf [file d6bm00329j1.pdf]

**Supporting Information**

***Fabrication of pH-responsive self-assembled  
biofilament and its application in non-invasive  
monitoring of wound healing.***

*Lelona Pradhan,<sup>a</sup> Niyamat M. A. Chimthanawala,<sup>b</sup> Santosh Biranje,<sup>a</sup> Sandeep More<sup>a</sup>,  
Sadhana S. Sathaye<sup>b</sup> and Ravindra V. Adivarekar<sup>a\*</sup>*

<sup>a</sup>Department of Fibres & Textile Processing Technology, Institute of Chemical Technology,  
Mumbai, 400019, India

<sup>b</sup>Department of Pharmaceutical Sciences and Technology, Institute of Chemical Technology,  
Mumbai, 400019, India

\*Email: [rv.adivarekar@ictmumbai.edu.in](mailto:rv.adivarekar@ictmumbai.edu.in)

## pH (range 1-13) sensitivity of CPC filament under visible and long UV

The filaments were subjected to different pH buffers ranging from pH 1 to pH 13,

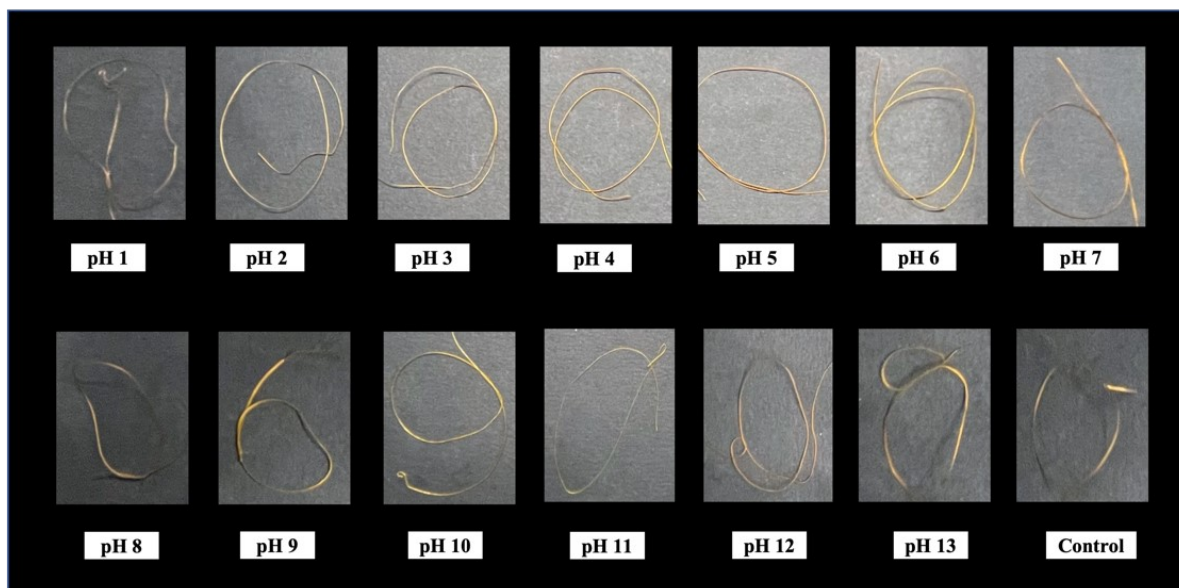

(a)

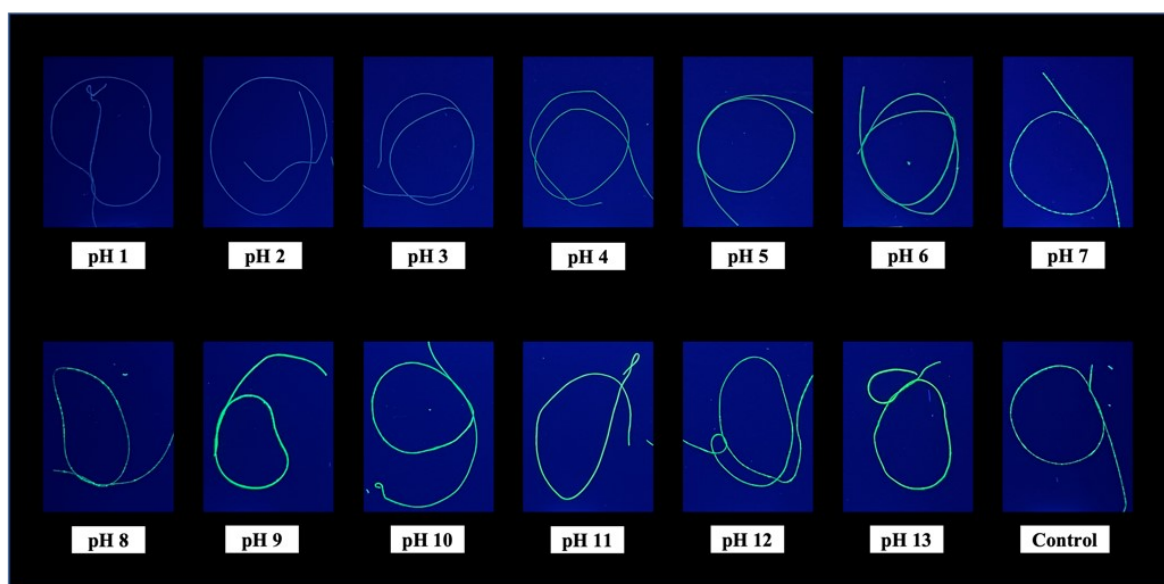

(b)

**Figure S1. Filaments under different light wavelengths, (a) Visible light and (b) Long UV (365 nm)**

NOTE: Filament named as “Control” refers to CPC filament without exposure to any pH and at normal condition

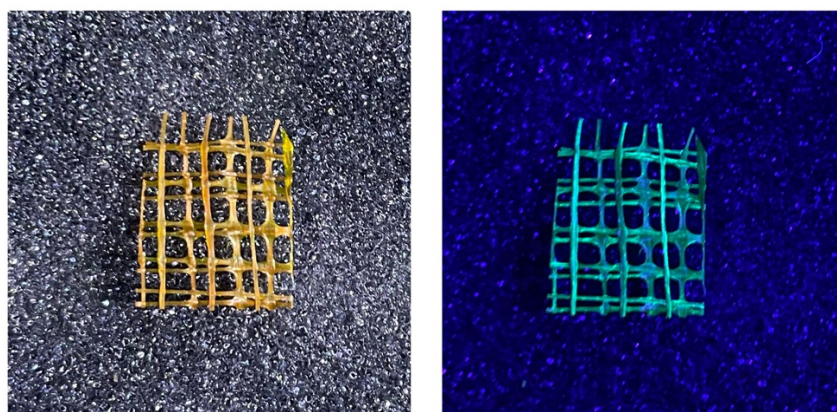

(a)

(b)

**Figure S2.** CPC wound patch under (a) visible light and (b) long UV

### UV absorption studies

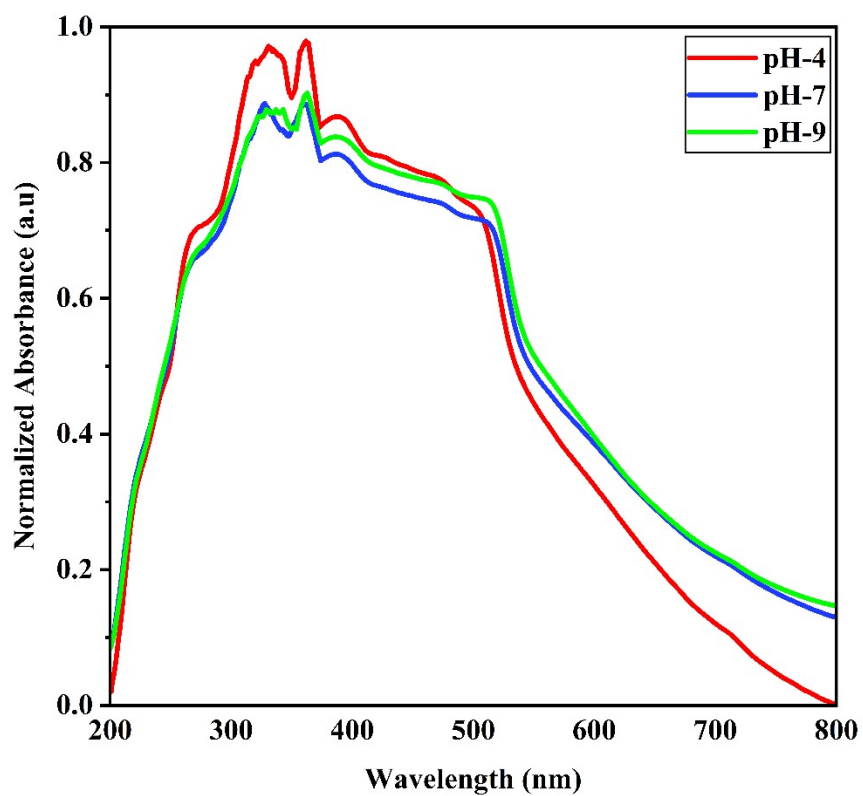

**Figure S3.** CPC patch absorption spectra measured at pH-4, pH-7 and pH-9
